# Supplementary material for: Metal toxin threat in wildland fires determined by geology and fire severity
Source: PubMed Central journal article supplement (PMC10716285; doi:10.1038/s41467-023-43101-9), 2023-12-12
Supplement: 41467_2023_43101_MOESM1_ESM.pdf [file 41467_2023_43101_MOESM1_ESM.pdf]

# Metal Toxin Threat in Wildland Fires Determined by Geology and Fire Severity

## Supplementary Information

Alandra Marie Lopez<sup>1</sup>, Juan Lezama Pacheco<sup>1</sup>, and Scott Fendorf<sup>1\*</sup>

<sup>1</sup> Earth System Science Department, Stanford University, Stanford, CA, 94305, USA

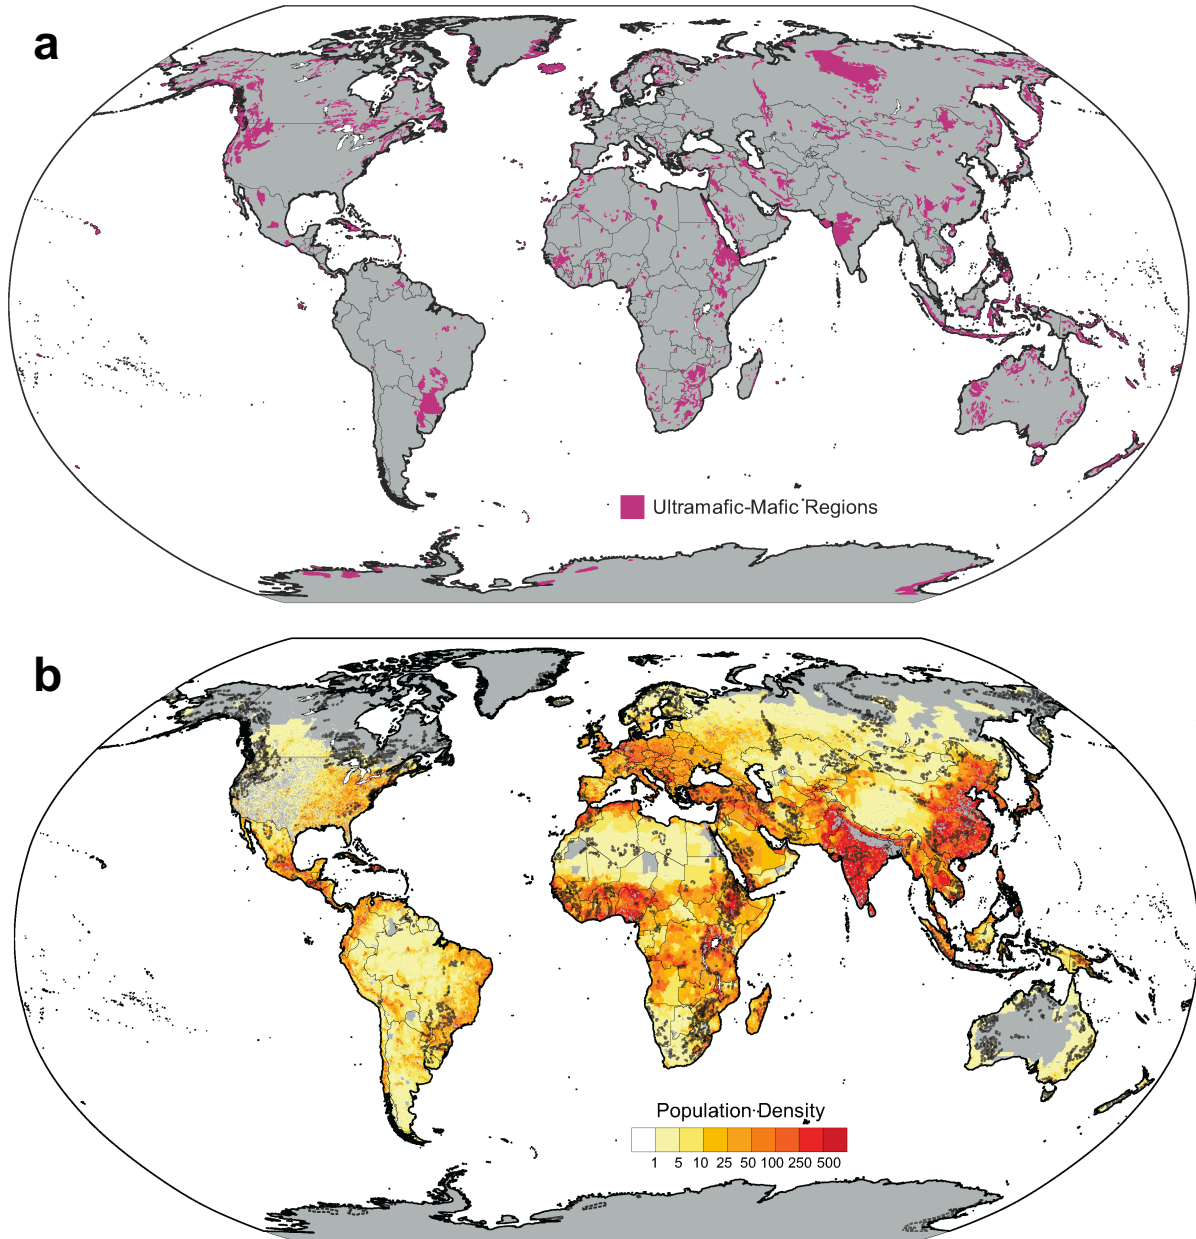

Supplementary Figure 1: **Global maps of metal-rich geology and population density.** a. Global map showing generalized domains of mafic and/or ultramafic geologies, inclusive of their metamorphic equivalents. b. Global map showing total population density using a projection model for 2020 based on a “middle-of-the-road” socio-economic scenario (SSP2) with generalized mafic and ultramafic regions shown with dashed lines.

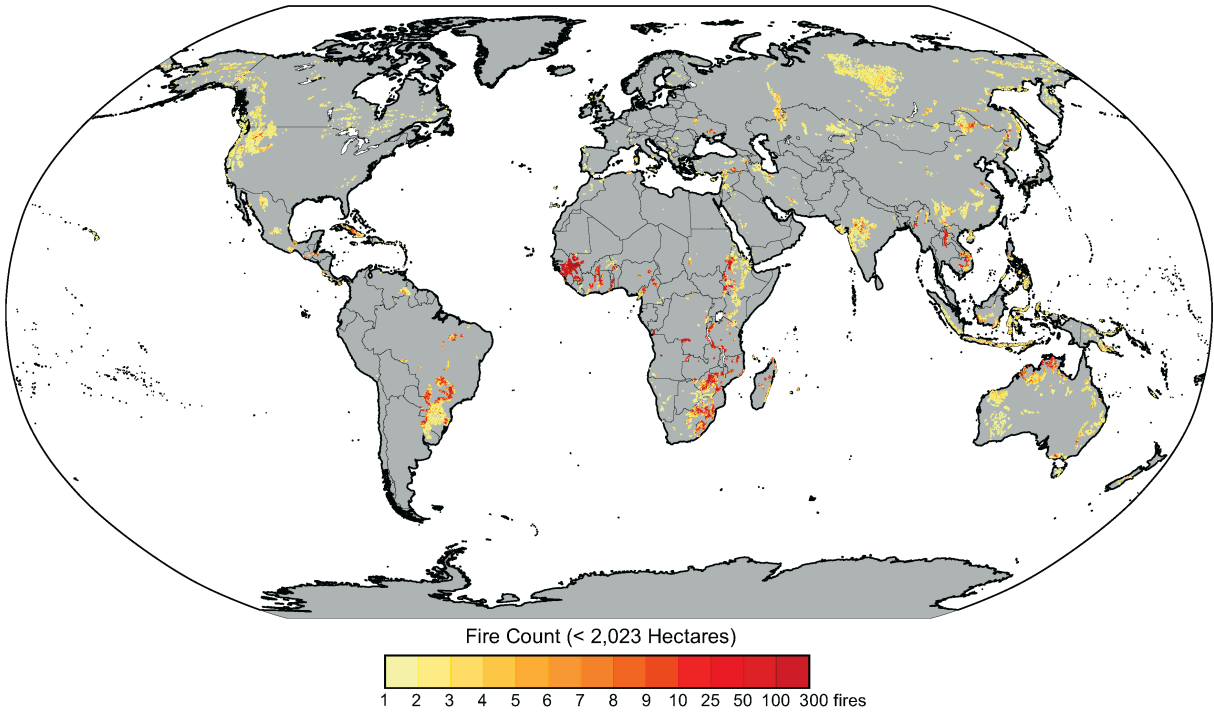

Supplementary Figure 2: **Frequency of small fires in metal-rich landscapes.** Satellite-derived number of fire occurrences less than 2,023 ha within generalized mafic and ultramafic landscapes (Supplementary Figure 1) from 2001-2020.

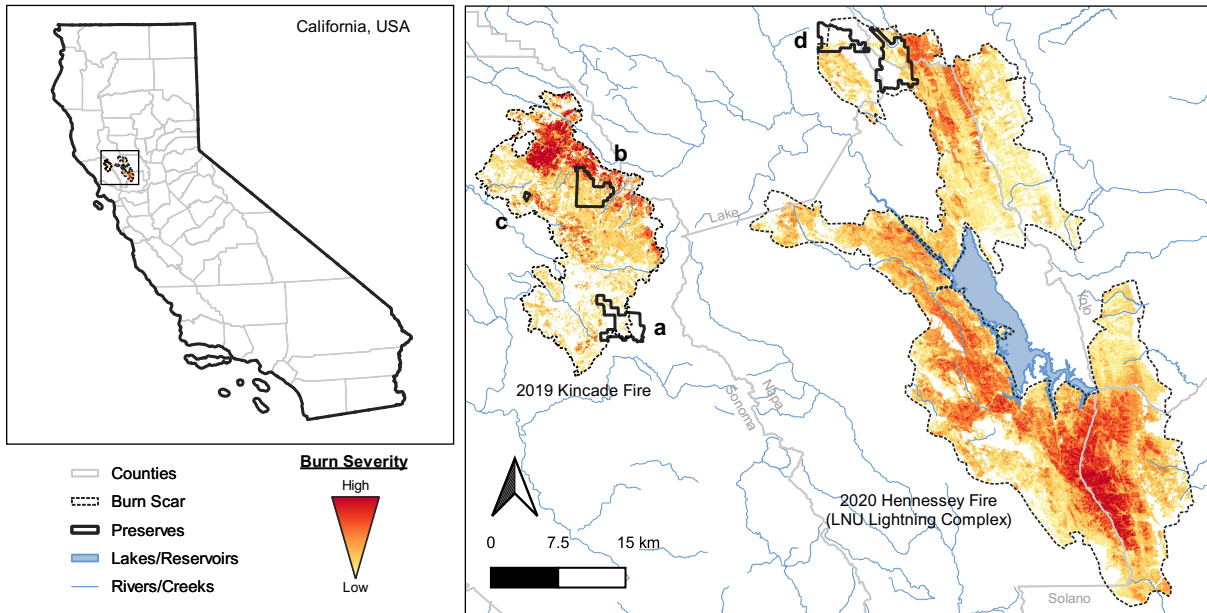

Supplementary Figure 3: **Four natural preserves within burn scars of the 2019 Kincadee Fire and 2020 Hennessey Fire.** a. Pepperwood Preserve, b. Modini Preserve, c. White Rock Preserve, and d. McLaughlin Natural Reserve. Visualization of relative burn severity (initial assessment) for each fire was estimated by the absolute difference between pre- and post-fire normalized burn ratio (NBR) using Landsat 8 images and clipped within fire boundaries. For the Kincadee Fire, the NBR was calculated based on cloud-free images (LC08\_L1TP\_045033) from October 1-18, 2019 (pre-fire) and November 2-15, 2019 (post-fire). For the Hennessey Fire (within the LNU Lightning Complex), cloud-free images (LC08\_L1TP\_044033) used were acquired from August 9-21, 2020 (pre-fire) and August 25-September 5, 2020 (post-fire).



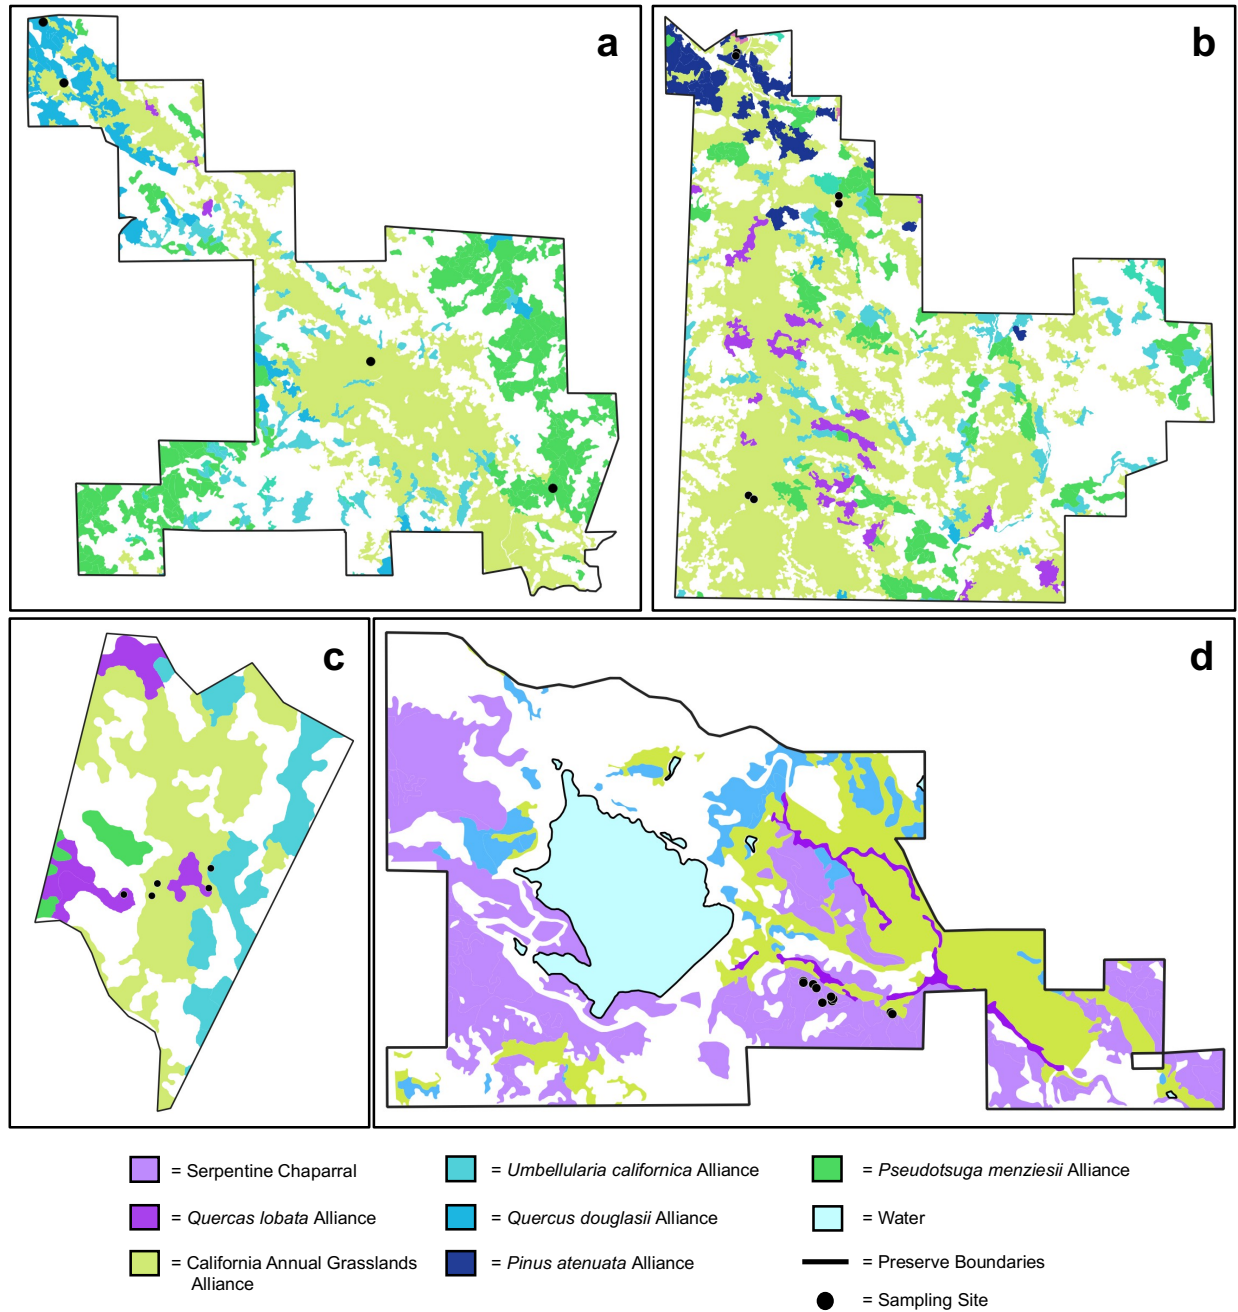

Supplementary Figure 4: **Vegetation classification at each sampling site.** a. Pepperwood Preserve, b. Modini Preserve, c. White Rock Preserve, and d. McLaughlin Natural Reserve. Sampling sites are represented by black points. Additional vegetation classes within regional maps that do not overlap with soil sampling sites were omitted for simplicity.

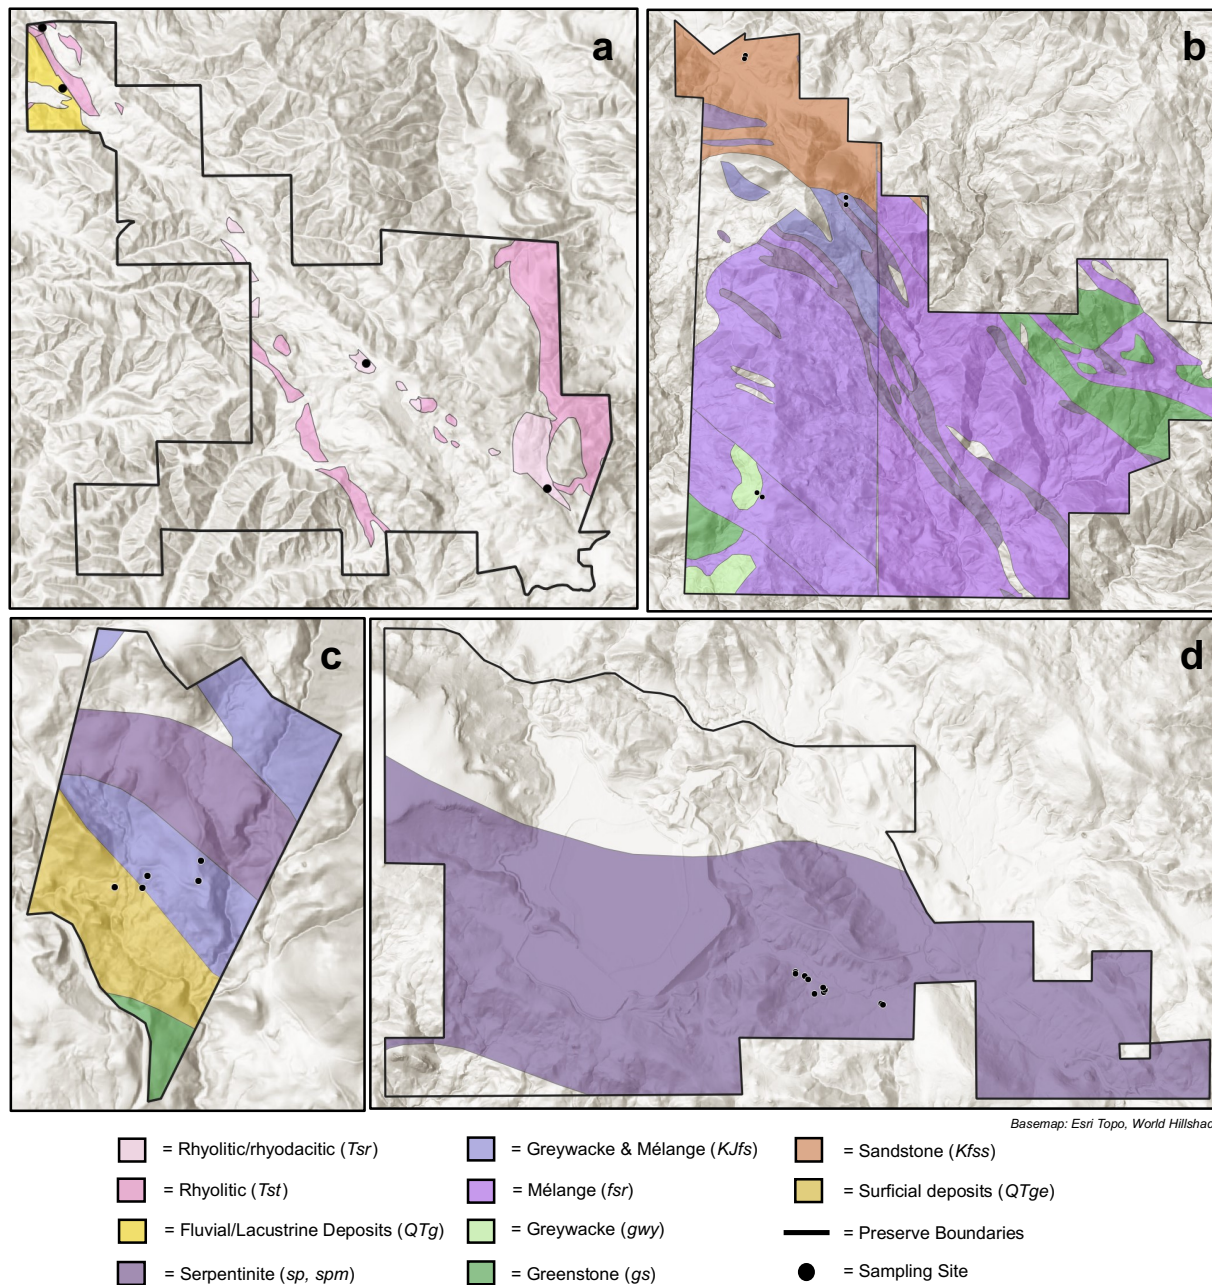

Supplementary Figure 5: **Surface bedrock geology at each sampling site.** a. Pepperwood Preserve, b. Modini Preserve, c. White Rock Preserve, and d. McLaughlin Natural Reserve. Sampling sites are represented by black points. Additional geologic units within regional maps that do not overlap with soil sampling sites were omitted for simplicity.

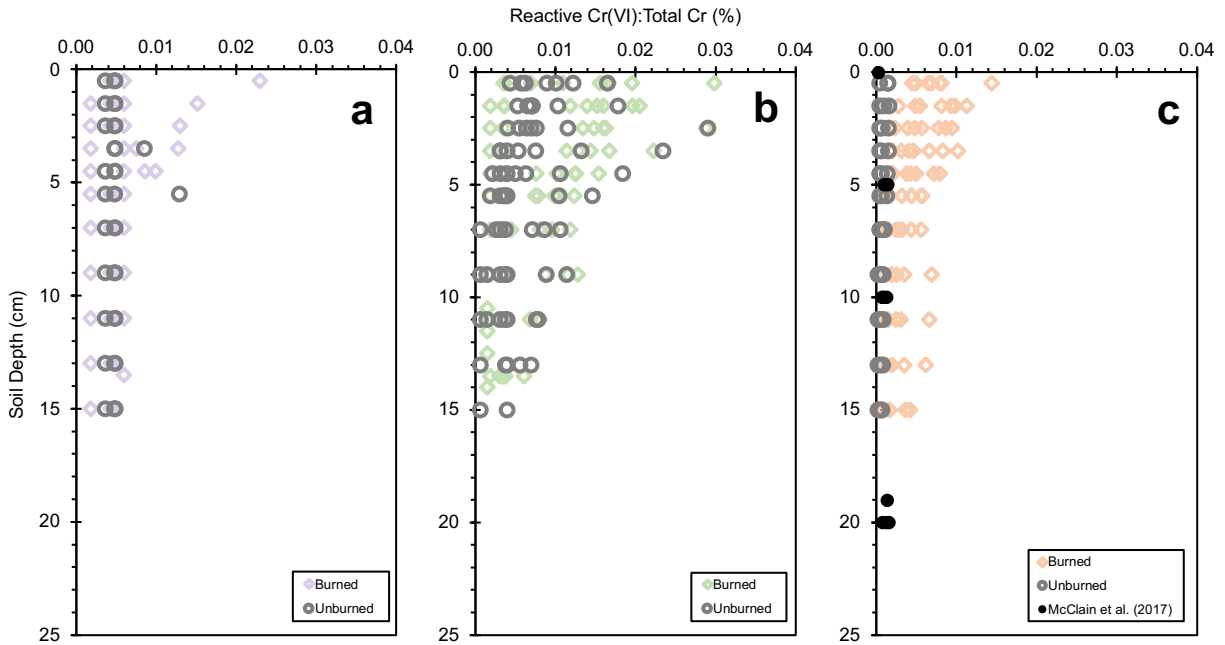

Supplementary Figure 6: **Fraction of total Cr that is reactive Cr(VI) in burned and unburned soils.** The ratio of reactive Cr(VI) to total Cr concentrations (as a percentage) within a. rhyolite-, b. mélange-, c. serpentinite-derived soil profiles (0-16 cm) that were not burned (gray circles; rhyolite, n = 3; mélange, n = 7; serpentinite, n = 3) or were fire-affected (colored diamonds; rhyolite, n = 4, purple; mélange, n = 9, green; serpentinite, n = 7, orange). Percentages were also plotted for serpentinite-derived soil (0-20 cm) from McClain *et al.* (2017) in c. for comparison (black circles)<sup>1</sup>. Each point represents the average percentage for a soil core based on triplicate measurements.



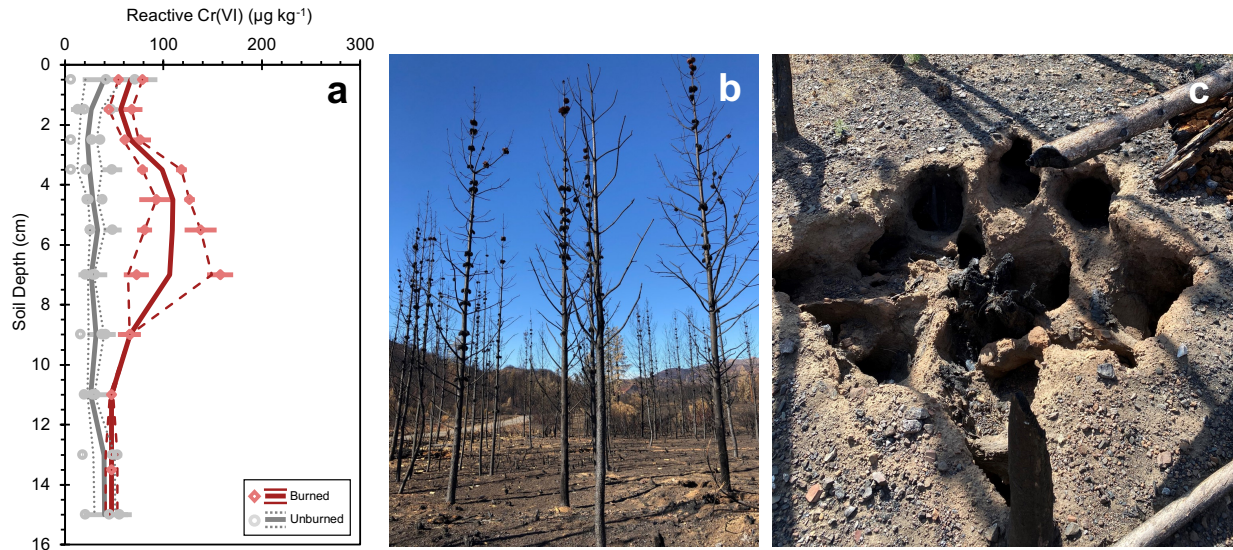

Supplementary Figure 7: **Reactive Cr(VI) concentrations within a severely burned forest.** a. Average reactive Cr(VI) concentrations ( $\mu\text{g kg}^{-1}$ ) within near surface soil profiles that were considered unburned (gray circles;  $n = 3$ ) and experienced high burn severity (red diamonds;  $n = 2$ ) in a densely vegetated knobcone pine forest. Each point represents the sample average of triplicates and error bars represent the standard error. Solid and dashed lines represent the mean (based on  $n$  soil cores) and standard error of the means, respectively. b. Photos of the burned forested area immediately after the 2019 Kincadee Fire. c. An example of a completely combusted tree root system nearly one year later (September 2020).

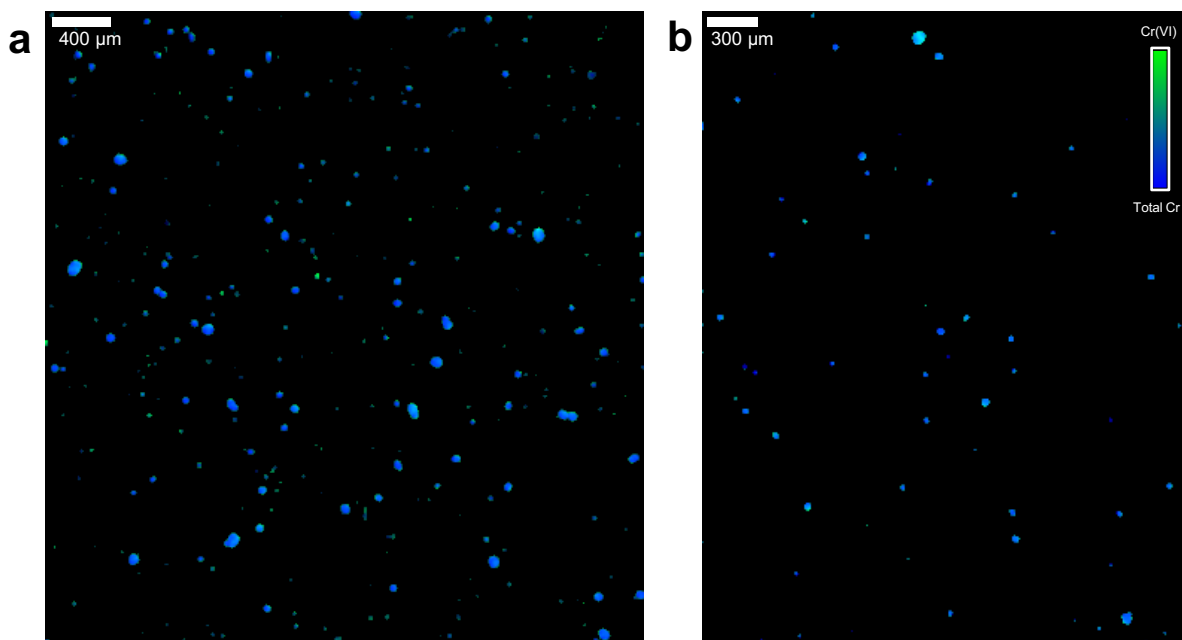

Supplementary Figure 8: **Total Cr(VI) in wind-dispersible soil and ash particles.**  $\mu$ -XRF image showing particle distribution of total Cr(VI) (green; estimated as the intensity ratio at 5993 and 6010 eV) and total Cr (blue; measured at 6010 eV) within the < 53- $\mu$ m size fraction of Cr-bearing soil-ash particulates from a. high fire severity site (A7) and b. low fire severity site (A1) in a serpentine chaparral.

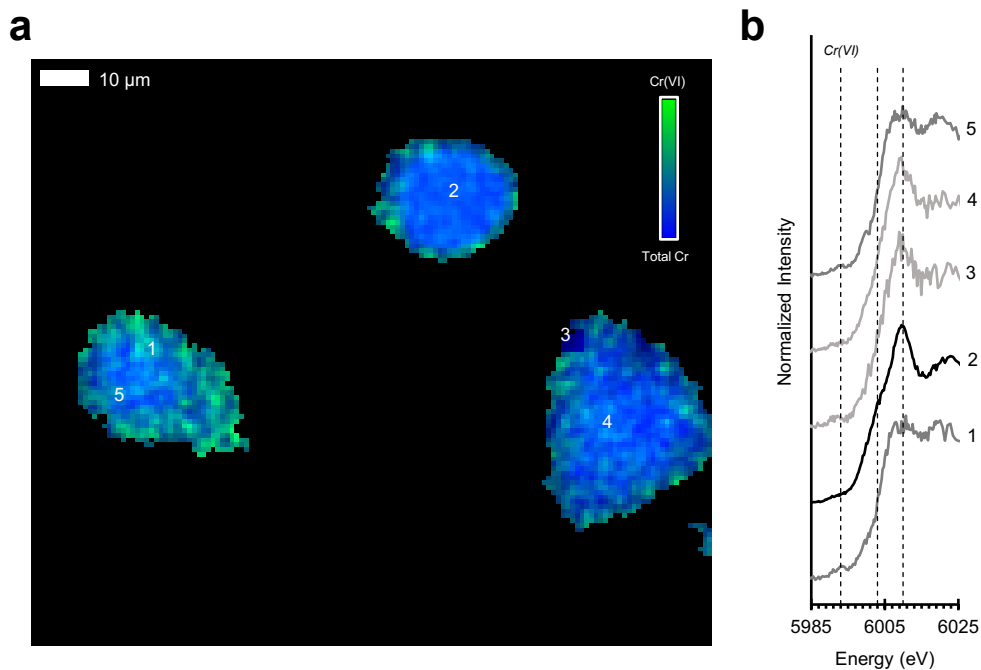

Supplementary Figure 9: **Total Cr(VI) in wind-dispersible soil and ash particles.** a.  $\mu$ -XRF image (pixel resolution: 1  $\mu\text{m}$ ) showing the relative intensity of Cr(VI) (green; estimated as the intensity ratio at 5993 and 6010 eV) and total Cr (blue; measured at 6010 eV) within the < 53- $\mu\text{m}$  size fraction of Cr-bearing soil-ash particulates from a serpentine chaparral that experienced high fire severity (A7). b. Normalized  $\mu$ -XANES spectra (Cr K-edge) from numbered locations on Cr-bearing particles in a. Dashed lines indicate energies characteristic of Cr(VI) (5993 eV), Cr(III) (6003 eV), and total Cr (6010 eV), at which  $\mu$ -XRF images were also collected.

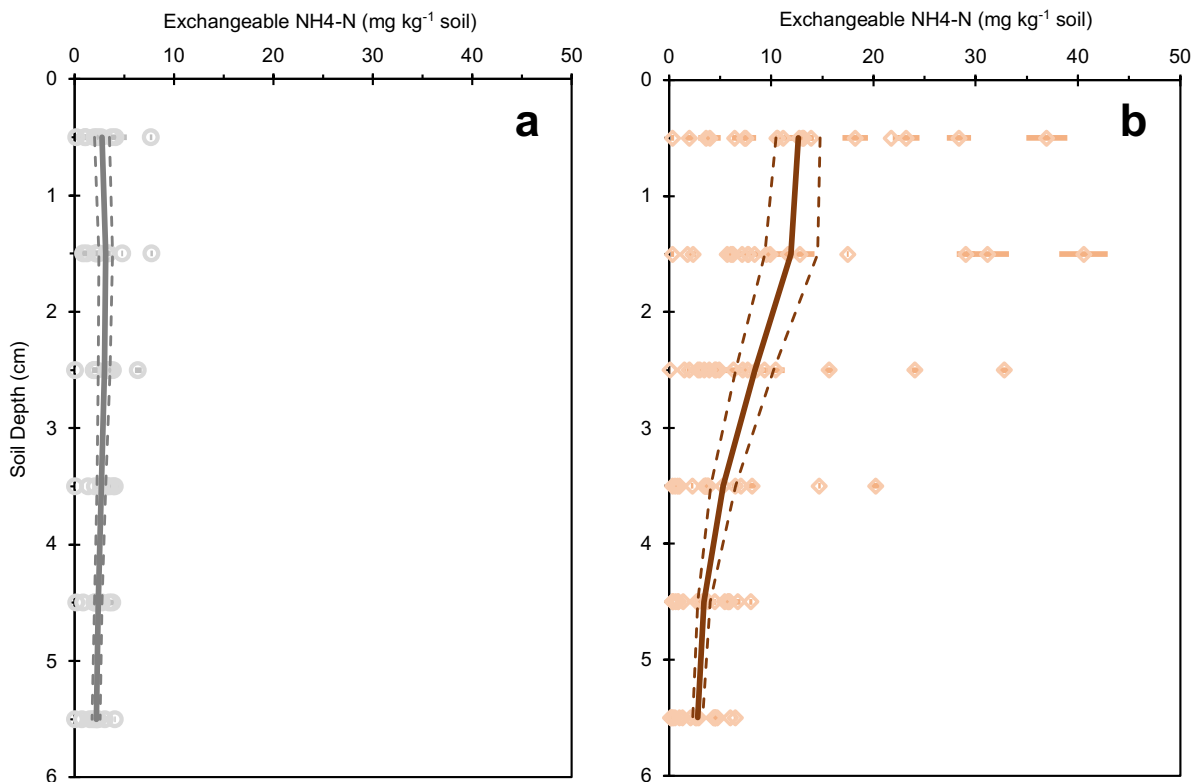

Supplementary Figure 10: **Ammonium concentrations within burned and unburned soils.** Exchangeable  $\text{NH}_4\text{-N}$  concentrations ( $\text{mg kg}^{-1}$  soil) across depths (cm) in a. unburned (gray circles,  $n = 9$ ) soil and b. burned (orange diamonds,  $n = 19$ ). Each point represents the sample average of triplicates and error bars represent the standard error. The solid and dashed lines represent mean concentrations (based on  $n$  soil cores) and standard error of the means, respectively, for burned and unburned soil in the top 6-cm.

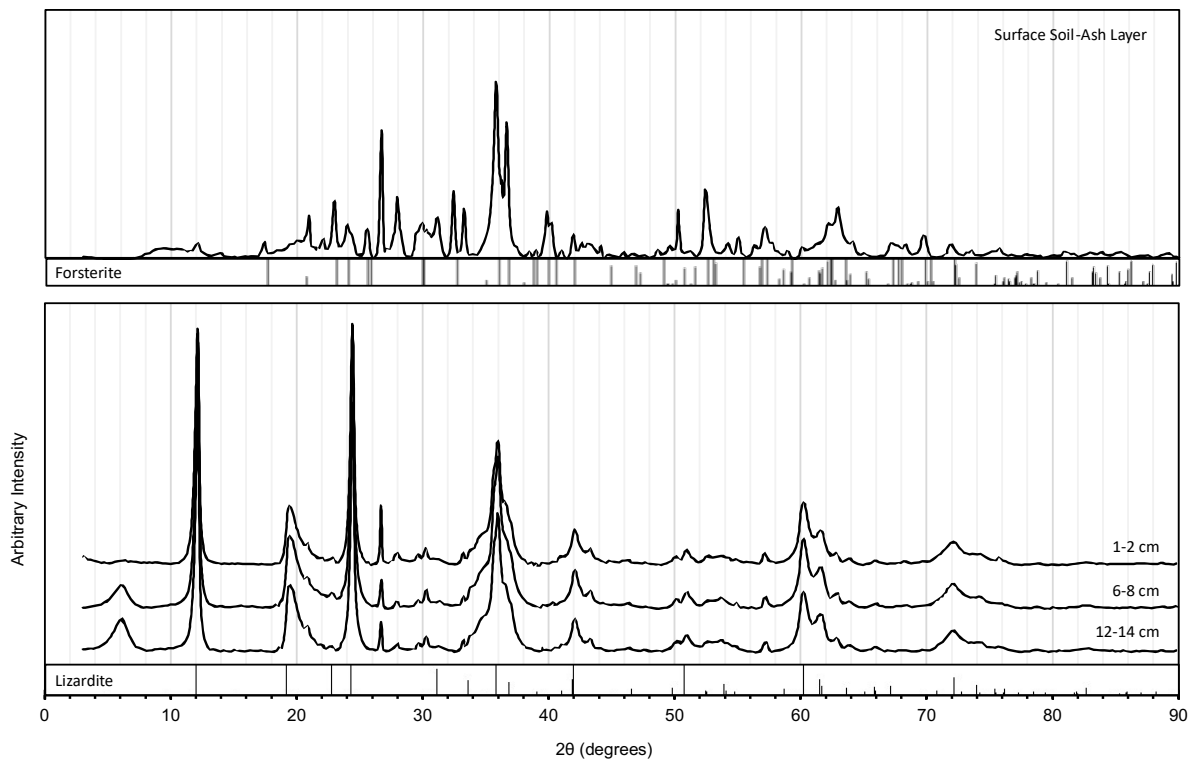

Supplementary Figure 11: **Bulk soil mineral transformations after high fire severity.** X-ray diffraction pattern of bulk mineralogy from a severely burned surface soil ash layer (A7) and associated soil depth intervals (1-2 cm, 6-8 cm, and 12-14 cm) collected from a serpentine chaparral and reference lines for forsterite (PDF Card No. 64741) and lizardite (PDF Card No. 81101).



Supplementary Table 1: Field site descriptions, including preserve location, wildfire, geology, general ecosystem type, estimated fire severity, and average total Cr (mg kg<sup>-1</sup>) and reactive Cr(VI) concentrations (µg kg<sup>-1</sup>) for each soil core.

| Soil Core           | Preserve <sup>a</sup> | Fire <sup>b</sup> | Geology                | Ecosystem | Fire Severity <sup>c</sup> | Total Cr (mg kg <sup>-1</sup> ) <sup>d</sup> |                | Reactive Cr(VI) (µg kg <sup>-1</sup> ) <sup>e</sup> |               |                 |                 |
|---------------------|-----------------------|-------------------|------------------------|-----------|----------------------------|----------------------------------------------|----------------|-----------------------------------------------------|---------------|-----------------|-----------------|
|                     |                       |                   |                        |           |                            | Mean (0-16 cm)                               | ± SE (0-16 cm) | Mean (0-2 cm)                                       | ± SE (0-2 cm) | Mean (10-16 cm) | ± SE (10-16 cm) |
| Fire-Affected Sites |                       |                   |                        |           |                            |                                              |                |                                                     |               |                 |                 |
| SC1                 | MLNR                  | 2020              | Serpentinite           | Chaparral | L                          | 1137                                         | 65             | 55.54                                               | 0.30          | 23.12           | 2.51            |
| SC2                 | MLNR                  | 2020              | Serpentinite           | Chaparral | L                          | 1711                                         | 119            | 105.96                                              | 12.69         | 19.23           | 3.61            |
| SC3                 | MLNR                  | 2020              | Serpentinite           | Chaparral | L                          | 1595                                         | 0              | 57.57                                               | 14.11         | 13.25           | 0.39            |
| SC4                 | MLNR                  | 2020              | Serpentinite           | Chaparral | M/H                        | 3023                                         | 531            | 220.30                                              | 24.89         | 16.87           | 2.43            |
| SC5                 | MLNR                  | 2020              | Serpentinite           | Chaparral | M/H                        | 2440                                         | 296            | 216.00                                              | 23.56         | 138.15          | 17.87           |
| SC6                 | MLNR                  | 2020              | Serpentinite           | Chaparral | M/H                        | 2003                                         | 97             | 257.33                                              | 31.67         | 67.96           | 3.31            |
| SC7                 | MLNR                  | 2020              | Serpentinite           | Chaparral | M/H                        | 2429                                         | 220            | 211.42                                              | 14.21         | 29.46           | 3.26            |
| M1                  | WR                    | 2019              | Mélange <sup>f</sup>   | Grassland | L                          | 330                                          | 32             | 14.50                                               | 8.50          | nd              | -               |
| M2                  | WR                    | 2019              | Mélange <sup>f</sup>   | Grassland | L                          | 404                                          | 30             | 79.02                                               | 0.18          | nd              | -               |
| M3                  | WR                    | 2019              | Mélange <sup>f</sup>   | Grassland | L                          | 177                                          | 7              | 32.53                                               | 3.75          | nd              | -               |
| M4                  | WR                    | 2019              | Mélange <sup>f</sup>   | Grassland | L                          | 159                                          | 5              | 21.84                                               | 2.95          | nd              | -               |
| M5                  | WR                    | 2019              | Mélange <sup>f</sup>   | Forest    | L                          | 354                                          | 32             | 57.75                                               | 1.19          | 28.33           | 0.88            |
| M6                  | MP                    | 2019              | Mélange <sup>f</sup>   | Grassland | L                          | 169                                          | 15             | nd                                                  | -             | nd              | -               |
| M7                  | MP                    | 2019              | Mélange <sup>f</sup>   | Grassland | L                          | 289                                          | 19             | 64.94                                               | 21.08         | 19.85           | 2.40            |
| M8                  | MP                    | 2019              | Mélange <sup>f</sup>   | Grassland | L                          | 634                                          | 26             | 83.62                                               | 9.35          | 18.18           | 0.93            |
| M9                  | MP                    | 2019              | Mélange <sup>f</sup>   | Grassland | L                          | 164                                          | 3              | nd                                                  | -             | 11.09           | 2.62            |
| F1                  | PP                    | 2019              | Rhyolite               | Forest    | L                          | 102                                          | 7              | nd                                                  | -             | nd              | -               |
| F2                  | PP                    | 2019              | Rhyolite               | Forest    | L                          | 124                                          | 2              | 23.55                                               | 4.81          | nd              | -               |
| F3                  | PP                    | 2019              | Rhyolite               | Grassland | L                          | 141                                          | 9              | nd                                                  | -             | nd              | -               |
| F4                  | PP                    | 2019              | Rhyolite               | Grassland | L                          | 338                                          | 7              | 10.81                                               | 4.81          | nd              | -               |
| SF1 <sup>g</sup>    | MP                    | 2019              | Sandstone <sup>h</sup> | Forest    | H                          | 686                                          | 15             | 49.49                                               | 4.81          | -               | -               |
| SF2                 | MP                    | 2019              | Sandstone <sup>h</sup> | Forest    | H                          | 968                                          | 78             | 73.47                                               | 5.51          | 47.25           | 0.03            |
| Unburned Sites      |                       |                   |                        |           |                            |                                              |                |                                                     |               |                 |                 |
| SC8                 | MLNR                  |                   | Serpentinite           | Chaparral |                            | 4070                                         | 71             | 61.04                                               | 3.04          | 32.65           | 1.42            |
| SC9                 | MLNR                  |                   | Serpentinite           | Chaparral |                            | 3162                                         | 253            | 38.03                                               | 7.81          | nd              | -               |
| SC10                | MLNR                  |                   | Serpentinite           | Chaparral |                            | 1340                                         | 14             | nd                                                  | -             | nd              | -               |
| M10                 | WR                    |                   | Mélange <sup>f</sup>   | Grassland |                            | 954                                          | 3              | 45.68                                               | 4.41          | nd              | -               |
| M11                 | WR                    |                   | Mélange <sup>f</sup>   | Grassland |                            | 162                                          | 5              | 27.65                                               | 1.06          | nd              | -               |
| M12                 | WR                    |                   | Mélange <sup>f</sup>   | Grassland |                            | 193                                          | 8              | 16.54                                               | 2.90          | 8.33            | 2.33            |
| M13                 | WR                    |                   | Mélange <sup>f</sup>   | Forest    |                            | 411                                          | 35             | 26.21                                               | 2.82          | 31.33           | 0.55            |
| M14                 | MP                    |                   | Mélange <sup>f</sup>   | Grassland |                            | 152                                          | 10             | 14.59                                               | 3.97          | nd              | -               |
| M15                 | MP                    |                   | Mélange <sup>f</sup>   | Grassland |                            | 423                                          | 47             | 26.70                                               | 0.72          | nd              | -               |

|     |    |                        |           |      |    |       |       |       |      |
|-----|----|------------------------|-----------|------|----|-------|-------|-------|------|
| M16 | MP | Mélange <sup>f</sup>   | Grassland | 190  | 8  | 18.20 | 1.30  | 13.98 | 0.87 |
| F5  | PP | Rhyolite               | Grassland | 125  | 4  | nd    | -     | nd    | -    |
| F6  | PP | Rhyolite               | Forest    | 166  | 16 | nd    | -     | nd    | -    |
| F7  | PP | Rhyolite               | Forest    | 127  | 13 | nd    | -     | nd    | -    |
| SF3 | MP | Sandstone <sup>h</sup> | Forest    | 1199 | 63 | 10.67 | 3.50  | 43.99 | 8.16 |
| SF4 | MP | Sandstone <sup>h</sup> | Forest    | 1081 | 56 | 30.74 | 11.00 | 19.48 | 0.78 |
| SF5 | MP | Sandstone <sup>h</sup> | Forest    | 1518 | 54 | 58.86 | 12.08 | 43.16 | 6.49 |

<sup>a</sup> MLNR = McLaughlin Natural Reserve, WR = White Rock Preserve, PP = Pepperwood Preserve, MP = Modini Preserve

<sup>b</sup> 2019 = Kincade Fire, 2020 = Hennessey Fire (LNU Lightning Complex)

<sup>c</sup> L = Low severity, M = Moderate severity, H = High severity

<sup>d</sup> Reported as the mean (n = 3-4 replicate measurements) ± standard error

<sup>e</sup> Reported as the mean (n = 3 replicate measurements for each depth interval) ± standard error of depth means; nd: all concentrations within depth range were below limit of detection (12 µg kg<sup>-1</sup>)

<sup>f</sup> Mélange (*KJfs*, *fsr*) from the Franciscan Complex contains a complex blend of rocks from tectonic mixing, including greenstone, metabasaltic blueschist, greywacke

<sup>g</sup> The soil depth range of core SF1 was 0-10 cm.

<sup>h</sup> Based on chemical analyses, the sandstone-derived soil was consistent with typical mafic chemical properties (geologic unit: *Kfss*)

Supplementary Table 2: Statistical comparison of reactive Cr(VI) concentrations ( $\mu\text{g kg}^{-1}$ ) in fire-affected (burned) versus unburned soil cores at near surface depths based on geology and fire severity using unpaired, two-sided t tests. Datasets were normal based on the Shapiro-Wilk test, and equal variances were determined using the f-test. Bold, italicized p-values indicate statistically significant differences at the 95% confidence interval ( $\alpha = 0.05$ ). The number of soil core replicates used to calculate means for each soil type is reported as  $n$  and detailed in Table S1.

| Geology               | Fire Severity | Fire Affected |                                | Unburned |                                | Difference                     |                                  | Unpaired t-test |    |                      |
|-----------------------|---------------|---------------|--------------------------------|----------|--------------------------------|--------------------------------|----------------------------------|-----------------|----|----------------------|
|                       |               | $n$           | Mean ( $\mu\text{g kg}^{-1}$ ) | $n$      | Mean ( $\mu\text{g kg}^{-1}$ ) | Mean ( $\mu\text{g kg}^{-1}$ ) | 95% CI ( $\mu\text{g kg}^{-1}$ ) | t-value         | df | p-value              |
| Near Surface (0-2 cm) |               |               |                                |          |                                |                                |                                  |                 |    |                      |
| Serpentinite          | Low           | 3             | 73.02                          | 3        | 35.02                          | 38.00                          | (-25.69, 101.7)                  | 1.66            | 4  | 0.1730               |
| Serpentinite          | Mod/High      | 4             | 226.3                          | 3        | 35.02                          | 191.2                          | (144.3, 238.2)                   | 10.48           | 5  | <b><i>0.0001</i></b> |
| Serpentinite          | All           | 7             | 160.6                          | 3        | 35.02                          | 125.6                          | (6.56, 244.6)                    | 2.43            | 8  | <b><i>0.0410</i></b> |
| Mélange <sup>a</sup>  | Low           | 9             | 40.69                          | 7        | 25.08                          | 15.61                          | (-9.01, 40.23)                   | 1.41            | 10 | 0.1888               |

<sup>a</sup> Welch's t-test (unequal variances)

Supplementary Table 3: Statistical comparison of reactive Cr(VI) concentrations ( $\mu\text{g kg}^{-1}$ ) in fire-affected (burned) versus unburned soil cores at deep (control) depths based on geology and fire severity using two-sided Mann-Whitney U tests. One or both datasets were not normally distributed based on the Shapiro-Wilk test. Bold, italicized p-values indicate statistically significant differences at the 95% confidence interval ( $\alpha = 0.05$ ). The number of soil core replicates used to calculate means for each soil type is reported as  $n$  and detailed in Table S1.

| Geology                   | Fire Severity | Fire Affected |                                | Unburned |                                | Mann-Whitney U Test |         |
|---------------------------|---------------|---------------|--------------------------------|----------|--------------------------------|---------------------|---------|
|                           |               | $n$           | Mean ( $\mu\text{g kg}^{-1}$ ) | $n$      | Mean ( $\mu\text{g kg}^{-1}$ ) | W                   | p-value |
| Control Depths (10-16 cm) |               |               |                                |          |                                |                     |         |
| Serpentinite              | Low           | 3             | 18.53                          | 3        | 14.88                          | 6                   | 0.6579  |
| Serpentinite              | Mod/High      | 4             | 63.11                          | 3        | 14.88                          | 10                  | 0.2118  |
| Serpentinite              | All           | 7             | 44.01                          | 3        | 14.88                          | 16                  | 0.2530  |
| Mélange                   | Low           | 9             | 11.94                          | 7        | 11.09                          | 33                  | 0.9071  |

Supplementary Table 4: Statistical comparison of reactive Cr(VI) concentrations ( $\mu\text{g kg}^{-1}$ ) in near surface versus deep (control) depths in soil cores based on geology and fire severity using two-sided Wilcoxon signed rank test. One or both datasets were not normally distributed based on the Shapiro-Wilk test. Bold, italicized p-values indicate statistically significant differences at the 95% confidence interval ( $\alpha = 0.05$ ). The number of soil core replicates used to calculate means for each soil type (same for surface and control depths) is reported as  $n$  and detailed in Table S1.

|               | Geology      | Fire Severity | $n$ | 0-2 cm                         | 10-16 cm                       | Wilcox Signed Rank Test |                      |
|---------------|--------------|---------------|-----|--------------------------------|--------------------------------|-------------------------|----------------------|
|               |              |               |     | Mean ( $\mu\text{g kg}^{-1}$ ) | Mean ( $\mu\text{g kg}^{-1}$ ) | V                       | p-value              |
| Fire-Affected |              |               |     |                                |                                |                         |                      |
|               | Serpentinite | All           | 7   | 160.6                          | 44.01                          | 28                      | <b><i>0.0156</i></b> |
|               | Mélange      | Low           | 9   | 40.69                          | 11.94                          | 35                      | <b><i>0.0209</i></b> |
| Unburned      |              |               |     |                                |                                |                         |                      |
|               | Serpentinite | -             | 3   | 35.02                          | 14.88                          | 3                       | 0.3711               |
|               | Mélange      | -             | 7   | 25.08                          | 11.09                          | 26                      | <b><i>0.0469</i></b> |

Supplementary Table 5: Statistical comparison of reactive Cr(VI) concentrations ( $\mu\text{g kg}^{-1}$ ) in near surface versus deep (control) depths in soil cores based on geology and fire severity using two-sided paired t tests. Datasets were normal based on the Shapiro-Wilk test. Bold, italicized p-values indicate statistically significant differences at the 95% confidence interval ( $\alpha = 0.05$ ). The number of soil core replicates used to calculate means for each soil type (same for surface and control depths) is reported as  $n$  and detailed in Table S1.

| Geology       | Fire Severity | $n$ | 0-2 cm                         | 10-16 cm                       | Difference                     |                                  | Paired t-test |    |                      |
|---------------|---------------|-----|--------------------------------|--------------------------------|--------------------------------|----------------------------------|---------------|----|----------------------|
|               |               |     | Mean ( $\mu\text{g kg}^{-1}$ ) | Mean ( $\mu\text{g kg}^{-1}$ ) | Mean ( $\mu\text{g kg}^{-1}$ ) | 95% CI ( $\mu\text{g kg}^{-1}$ ) | t-value       | df | p-value              |
| Fire-Affected |               |     |                                |                                |                                |                                  |               |    |                      |
| Serpentinite  | Low           | 3   | 73.02                          | 18.53                          | 54.49                          | (-16.42, 125.4)                  | 3.31          | 2  | 0.0806               |
| Serpentinite  | Mod/High      | 4   | 226.27                         | 63.11                          | 163.15                         | (71.56, 254.8)                   | 5.67          | 3  | <b><i>0.0109</i></b> |

Supplementary Table 6: Physicochemical characteristics of bulk soil and ash (up to 2 mm), and selected fine size fractions less than 53  $\mu\text{m}$ , collected from surface layers of the burned serpentine chaparral, and mean elemental concentrations from bulk underlying soil based on geology type (rhyolitic, m $\acute{e}$ lange, and serpentine).

| ID                                       | Fire Severity <sup>a</sup> | % Sand <sup>b</sup><br>(2-0.05 mm) | % Silt <sup>c</sup><br>(53-2 $\mu\text{m}$ ) | % Clay <sup>c</sup><br>(< 2 $\mu\text{m}$ ) | Cr<br>mg kg <sup>-1</sup> | Fe<br>mg g <sup>-1</sup> | Mn<br>mg kg <sup>-1</sup> | Ni<br>mg kg <sup>-1</sup> | Ca<br>mg g <sup>-1</sup> | Mg<br>mg g <sup>-1</sup> | Na<br>mg g <sup>-1</sup> | K<br>mg g <sup>-1</sup> |
|------------------------------------------|----------------------------|------------------------------------|----------------------------------------------|---------------------------------------------|---------------------------|--------------------------|---------------------------|---------------------------|--------------------------|--------------------------|--------------------------|-------------------------|
| Surface Soil-Ash                         |                            |                                    |                                              |                                             |                           |                          |                           |                           |                          |                          |                          |                         |
| A1                                       | L                          |                                    |                                              |                                             | 1147                      | 64.7                     | 1351                      | 1528                      | 15.5                     | 77.3                     | 4.63                     | 3.76                    |
| A2                                       | L                          |                                    |                                              |                                             | 1532                      | 69.1                     | 1203                      | 2530                      | 10.2                     | 158                      | < 0.1                    | 1.65                    |
| A3                                       | M/H                        |                                    |                                              |                                             | 1606                      | 84.2                     | 1480                      | 3117                      | 9.3                      | 148                      | < 0.1                    | 1.54                    |
| A4                                       | M/H                        | 87.5                               | 11.7                                         | 0.8                                         | 2256                      | 78.9                     | 1438                      | 3380                      | 8.7                      | 159                      | < 0.1                    | 0.90                    |
| A5                                       | M/H                        |                                    |                                              |                                             | 999                       | 57.7                     | 1022                      | 1849                      | 10.2                     | 125                      | 2.10                     | 2.48                    |
| A6                                       | M/H                        | 78.2                               | 20.2                                         | 1.6                                         | 1970                      | 79.2                     | 1555                      | 2726                      | 29.9                     | 174                      | < 0.1                    | 2.86                    |
| A7                                       | M/H                        | 85.7                               | 12.9                                         | 1.4                                         | 4829                      | 102                      | 1543                      | 2643                      | 17.9                     | 211                      | < 0.1                    | 2.29                    |
| Less than 53 $\mu\text{m}$ size fraction |                            |                                    |                                              |                                             |                           |                          |                           |                           |                          |                          |                          |                         |
| A4                                       | M/H                        |                                    |                                              |                                             | 1133                      | 94.7                     | 1975                      | 3042                      | 41.5                     | 124                      | < 0.1                    | 3.38                    |
| A6                                       | M/H                        |                                    |                                              |                                             | 946                       | 82.7                     | 1910                      | 2294                      | 44.2                     | 133                      | < 0.1                    | 4.41                    |
| A7                                       | M/H                        |                                    |                                              |                                             | 1643                      | 105                      | 2547                      | 3489                      | 34.0                     | 189                      | 2.02                     | 3.91                    |
| Bulk Soil <sup>d</sup>                   |                            |                                    |                                              |                                             |                           |                          |                           |                           |                          |                          |                          |                         |
| Rhyolitic (n = 7)                        |                            |                                    |                                              |                                             | 162                       | 34.5                     | 796                       | 88                        | 10.7                     | 7.9                      | 13.6                     | 9.70                    |
| Melange (n = 16)                         |                            |                                    |                                              |                                             | 314                       | 50.0                     | 855                       | 259                       | 10.7                     | 37.3                     | 8.17                     | 13.2                    |
| Serpentine (n = 10)                      |                            |                                    |                                              |                                             | 2373                      | 87.1                     | 1511                      | 2929                      | 4.4                      | 150                      | 3.61                     | 1.69                    |

<sup>a</sup> L = Low severity, M = Moderate severity, H = High severity

<sup>b</sup> Determined by sieve analysis

<sup>c</sup> Determined by laser diffraction particle size counter

<sup>d</sup> Bulk soil concentrations are mean values using all soil cores (fire-affected and unburned) for each geology type: rhyolitic ( $n = 7$ ), m $\acute{e}$ lange ( $n = 16$ ), and serpentine ( $n = 10$ ).

Supplementary Table 7: Results (*W* statistic and p-values) from Shapiro-Wilk tests to assess data normality for reactive Cr(VI) concentrations ( $\mu\text{g kg}^{-1}$ ). Bold, italicized p-values indicate data do not meet normality assumption and thus were analyzed using nonparametric tests. The number of soil core replicates used to calculate means and standard errors (SE) for each soil type (same for surface and control depths) is reported as *n* and detailed in Table S1.

| Geology             | Fire Severity | <i>n</i> | Near Surface (0-2 cm)          |                                    |          |         | Control Depth (10-16 cm)       |                                    |          |               |
|---------------------|---------------|----------|--------------------------------|------------------------------------|----------|---------|--------------------------------|------------------------------------|----------|---------------|
|                     |               |          | Mean ( $\mu\text{g kg}^{-1}$ ) | $\pm$ SE ( $\mu\text{g kg}^{-1}$ ) | <i>W</i> | p-value | Mean ( $\mu\text{g kg}^{-1}$ ) | $\pm$ SE ( $\mu\text{g kg}^{-1}$ ) | <i>W</i> | p-value       |
| Fire-Affected Sites |               |          |                                |                                    |          |         |                                |                                    |          |               |
| Serpentinite        | Low           | 3        | 73.0                           | 16.5                               | 0.780    | 0.068   | 18.5                           | 2.9                                | 0.985    | 0.768         |
| Serpentinite        | Mod/High      | 4        | 226.3                          | 10.5                               | 0.785    | 0.078   | 63.1                           | 27.3                               | 0.903    | 0.444         |
| Serpentinite        | All           | 7        | 160.6                          | 32.1                               | 0.841    | 0.100   | 44.0                           | 17.2                               | 0.725    | <b>0.0069</b> |
| Rhyolite            | Low           | 4        | 12.2                           | 4.1                                | 0.802    | 0.107   | <i>nd</i>                      | -                                  | -        | -             |
| Mélange             | Low           | 9        | 40.7                           | 10.4                               | 0.889    | 0.196   | 11.0                           | 3.2                                | 0.770    | <b>0.0093</b> |
| Unburned Sites      |               |          |                                |                                    |          |         |                                |                                    |          |               |
| Serpentinite        | -             | 3        | 35.1                           | 15.9                               | 0.991    | 0.820   | 16.5                           | 8.1                                | 0.750    | <b>0.000</b>  |
| Rhyolite            | -             | 3        | <i>nd</i>                      | -                                  | -        | -       | <i>nd</i>                      | -                                  | -        | -             |
| Mélange             | -             | 7        | 25.2                           | 3.9                                | 0.862    | 0.156   | 10.7                           | 3.8                                | 0.649    | <b>0.0010</b> |



## Supplementary References

1. McClain, C. N., Fendorf, S., Webb, S. M. & Maher, K. Quantifying Cr(VI) Production and Export from Serpentine Soil of the California Coast Range. *Environ. Sci. Technol.* **51**, 141–149 (2017).
